# Supplementary material for: Rapid Response to Effusive Eruptions Using Satellite Infrared Data: The March 2024 Eruption of Fernandina (Galápagos)
Source: MDPI journal article supplement (doi:10.3390/rs17071191), 2025-03-27
Supplement: s1 [file README.pdf › Supplementary_Material_Shapefiles_Coppola_et_al_2025_RS/README.pdf]

# Supplementary Geospatial Data for the March 2024 Fernandina Eruption (Galápagos)

## Overview

The shapefiles contained in this folder (provided in **EPSG:4326 - WGS 84** coordinate system) correspond to the **Fernandina eruption, Galápagos (ECUA)**, which commenced on **March 3rd, 2024**. Details on the data processing, calculation methods, and retrieval techniques can be found in the publication by **Coppola et al. (2025)**, titled:

*"Rapid response to effusive eruptions using satellite infrared data: The March 2024 eruption of Fernandina (Galápagos)"* published in the journal *Remote Sensing*.

The file is distributed under the **CC BY 4.0** license. You are free to share, copy, and redistribute these files in any medium or format for any purpose, provided that you **cite Coppola et al. (2025) as the original source**.

---

## Layer Contents

The folder contains the following layers:

1. **Areal\_Expansion\_and\_Advancement\_Chronology:**
  - Supervised advancement and emplacement chronology reconstructed from multiple satellite sources.
2. **Lava\_Flow\_Outline:**
  - Total extent of the lava field.
3. **Lava\_Delta:**
  - Reconstructed lava delta extent.
4. **Fernandina\_Island:**
  - Coastline of Fernandina Island at a 1:50,000 scale, accessed free of charge from the Ecuador Geoportal: [Ecuador Geoportal - Free Access Cartography](#)
5. **Caldera\_Rim:**
  - Approximate shape and extent of the caldera rim.
6. **Elevation\_Intervals:**
  - Benchmarks at 250 m intervals overlaid on contour lines.
7. **Contours\_250m:**

- Equidistant contour lines at 250 m, based on a Digital Elevation Model (DEM) upsampled from the Shuttle Radar Topography Mission (SRTM - NASA JPL, 2013).

8. **Contours\_50m:**

- Equidistant contour lines at 50 m, based on a DEM upsampled from the Shuttle Radar Topography Mission (SRTM - NASA JPL, 2013).

9. **Main\_Vent:**

- Location of the main volcanic vent.

10. **Eruptive\_Fissures:**

- Approximate location and shape of the eruptive fissure system, inferred from high-resolution PlanetScope imagery.

---

## Citation

For any scientific work using this geospatial package, please **cite as follows**:

**Coppola et al. (2025).** Rapid response to effusive eruptions using satellite infrared data: The March 2024 eruption of Fernandina (Galápagos). *Remote Sensing*.
